# Supplementary material for: Transcriptomic Analysis Provides Insights into the Differential Effects of Aluminum on Peanut (Arachis hypogaea L.)
Source: MDPI journal article supplement (doi:10.3390/genes13101830), 2022-10-10
Supplement: s1 [file s1]

## Supporting Information

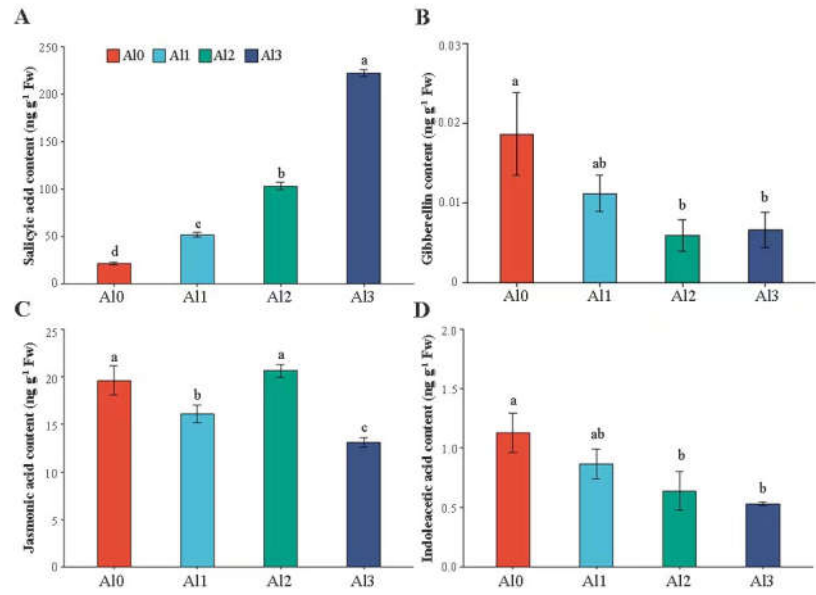

**Figure S1.** Effect of different  $\text{Al}^{3+}$  concentrations on the plant hormone content. The effect of Al treatments on salicylic content (A). The effect of Al treatments on gibberellin content (B). The effect of Al treatments on jamonic acid content (C). The effect of Al treatments on indoleacetic acid content (D). Al0, Al1, Al2 and Al3 represent 0 (pH 6.85), 1.25 (pH 4.03), 2.5 (pH 3.85) and 5 (pH 3.69) mmol/L  $\text{AlCl}_3 \cdot 18\text{H}_2\text{O}$  solutions, respectively. Data are means ( $\pm \text{SE}$ ),  $n=3$ . Marking the same letters means  $P \geq 0.05$  (LSD), there is no significant difference, the difference between different letters means  $P < 0.05$  (LSD), and the difference is significant.
